# Supplementary material
Source: Springer Nature journal article supplement (https://www.springermedizin.de/resource/supplementary/12950_2010_177_MOESM6_ESM.pdf/9558136)

## A) LPS

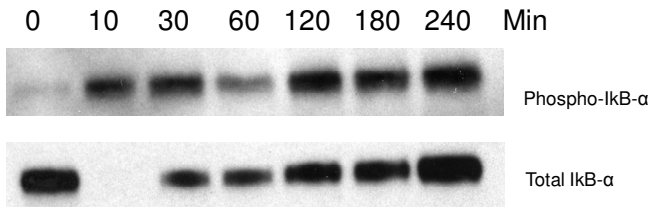

## B) LPS + TMP

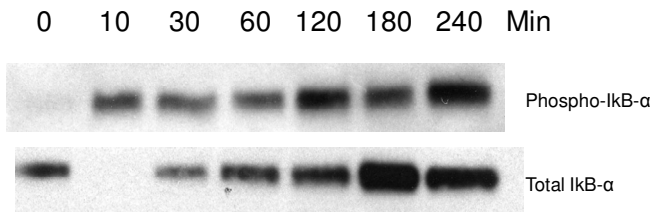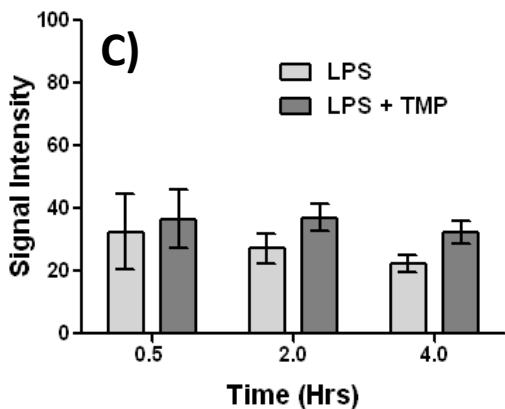

Supplement: MOESM6 [file 9558136]
